# Supplementary material
Source: publisher figshare collection journal article supplement (https://karger.figshare.com/ndownloader/files/31580933)

**Fig. S1** AMAGINE-2 and -3 study designs. Q2W, every 2 weeks; Q4W, every 4 weeks; Q8W, every 8 weeks; R, randomized.

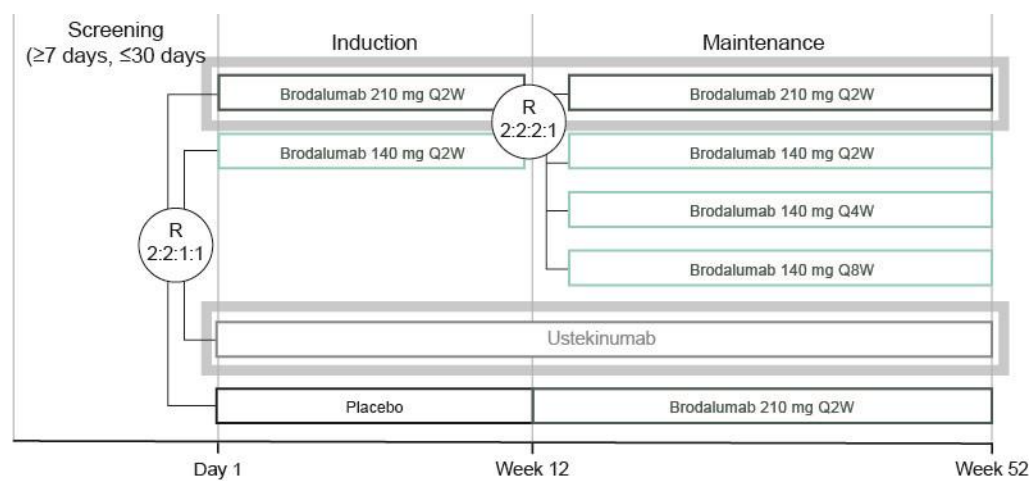

Supplement: Supplementary file 1 [file 31580933]
